# Supplementary material for: Antibody Generation and Rapid Immunochromatography Using Time-Resolved Fluorescence Microspheres for Propiconazole: Fungicide Abused as Growth Regulator in Vegetable
Source: MDPI journal article supplement (doi:10.3390/foods11030324), 2022-01-24
Supplement: s1 [file s1]

## *Supporting information*

# **Antibody generation and rapid immunochromatography using time-resolved fluorescence microspheres for propiconazole: fungicide abused as growth regulator in vegetable**

**Bo Chen <sup>1</sup>, Xing Shen <sup>1</sup>, Zhaodong Li <sup>2</sup>, Jin Wang <sup>1</sup>, Xiangmei Li <sup>1</sup>, Zhenlin Xu <sup>1</sup>, Yudong Shen <sup>1</sup>, Yi Lei <sup>3</sup>, Xinan Huang <sup>4</sup>, Xu Wang <sup>5</sup>, Hongtao Lei <sup>1,\*</sup>**

<sup>1</sup> Guangdong Province Key Laboratory of Food Quality and Safety, College of Food Science, South China Agricultural University, Guangzhou 510642, China

<sup>2</sup> College of materials and energy, South China Agricultural University, Guangzhou 510642, China

<sup>3</sup> Guangdong Institute of Food Inspection, Zengcha Road, Guangzhou 510435, China

<sup>4</sup> Tropical Medicine Institute and South China Chinese Medicine Collaborative Innovation Center, Guangzhou University of Chinese Medicine, Guangzhou 510405, China

<sup>5</sup> Institute of Quality Standard and Monitoring Technology for Agro-products of Guangdong Academy of Agricultural Sciences, Guangzhou 510405, China

\* Corresponding author. Hongtao Lei (hongtao@scau.edu.cn), Tel: +8620-8528 3925. Fax: +8620-8528 0270.

\* Corresponding author.

Hongtao Lei (hongtao@scau.edu.cn), Tel: +8620-8528 3448. Fax: +8620-8528 0270.

**This file includes:**

Supplementary Figures S1-S6

# Supplementary Figures

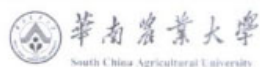

## Results of ethical review of animal experiments

No: 2020e009

|                                                     |                                                                                                                                                                                       |              |             |            |
|-----------------------------------------------------|---------------------------------------------------------------------------------------------------------------------------------------------------------------------------------------|--------------|-------------|------------|
| Experiment Item                                     | Research on the Key Technology of Multidimensional Inspection of the Authenticity of Important Food                                                                                   |              |             |            |
| Application number                                  | 2020E009                                                                                                                                                                              |              |             |            |
| Comments on conservation of experimental animals    | All the experimental mice used in this experiment came from an experimental animal center legal license. The type, quantity, and grouping of mice were conformed to the 3R principle. |              |             |            |
| Comments on ethical and moral                       | This experiment was carried out in a laboratory with a license for experiment animals, which was confirmed to the welfare principle.                                                  |              |             |            |
| Comments on ethical and moral                       | The animals were euthanized after the experiment.                                                                                                                                     |              |             |            |
| Comments on comprehensive scientific evaluation     | This experimental study has scientific significance.                                                                                                                                  |              |             |            |
| Time of experiment animal type and quantity         | Date: 2020-09-01 to 2020-12-01.<br>Experimental animal: CV New Zealand white rabbit.<br>Quantity: 10 female and 10 male                                                               |              |             |            |
| Comments of the ethical reviewer                    | Agree                                                                                                                                                                                 |              |             |            |
|                                                     | Reviewer                                                                                                                                                                              | Wei Huang    | Review Date | 2020-08-16 |
| Comments of the ethical reviewer                    | Agree                                                                                                                                                                                 |              |             |            |
|                                                     | Reviewer                                                                                                                                                                              | Rangcai Yu   | Review Date | 2020-08-16 |
| Final comments of the director (or deputy director) | Agree                                                                                                                                                                                 |              |             |            |
|                                                     | Review                                                                                                                                                                                | Zhonghua Liu | Review Date | 2020-08-16 |

Experimental Animal Ethics Committee of  
South China Agricultural University

Date: 2020-08-16

Figure S1. Ethical review of animal experiments.

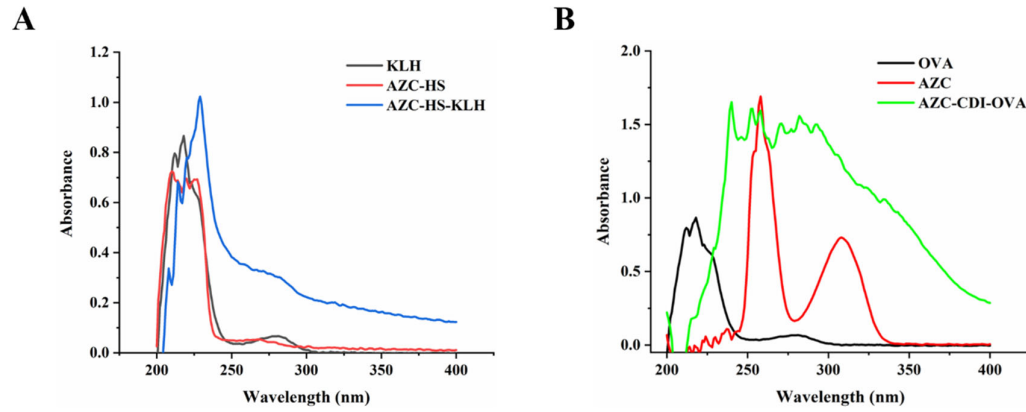

**Figure S2.** The result of hapten-carrier conjugation. (A) The UV-VIS spectroscopy of AZC-HS, KLH, and conjugates. (B) The UV-VIS spectroscopy of AZC, OVA, and conjugates. UV-VIS, Ultraviolet-visible spectroscopy. KLH, Keyhole limpet hemocyanin. OVA, Albumin from chicken egg white. CDI, N, N'-Carbonyldiimidazole.

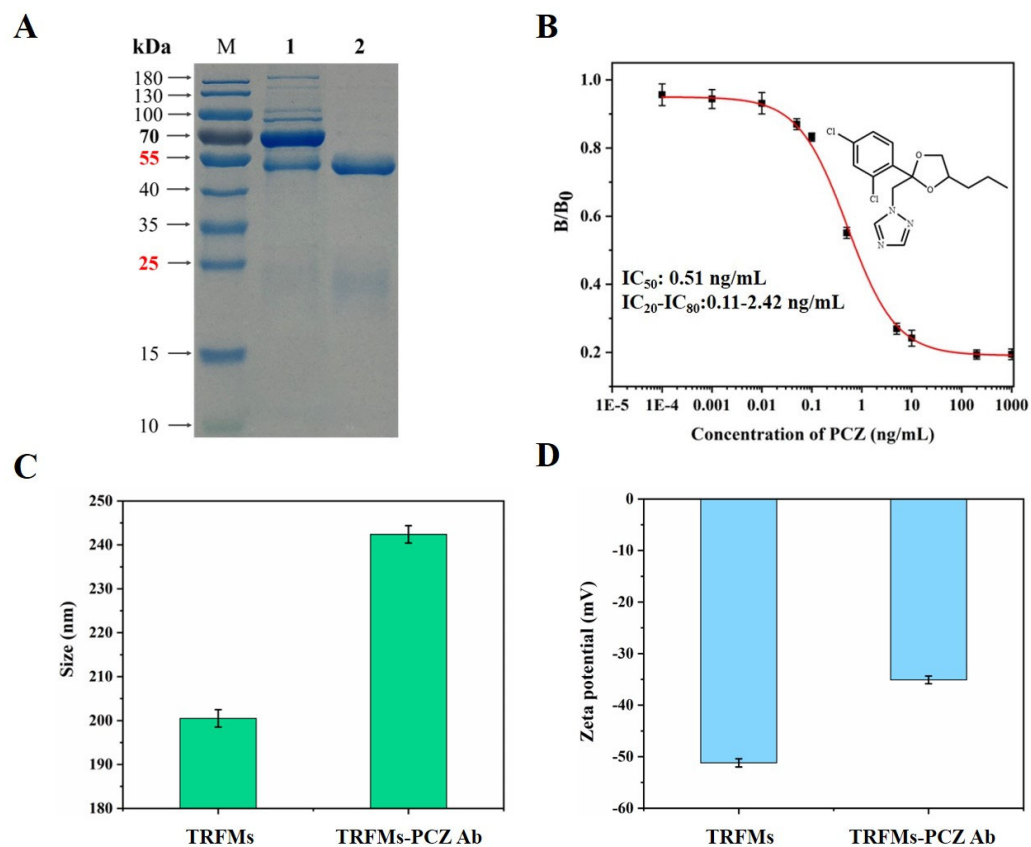

**Figure S3.** Characterization of PCZ Ab and TRFMs-PCZ Ab conjugation. (A) The result of SDS-PAGE. Lane M, standard protein markers. Lane 1, Before purification. Lane 2, After purification. (B) Standard curve of antibody. (C) The average particle size of TRFMs and TRFMs-PCZ Ab. (D) The zeta potential of TRFMs and TRFMs-PCZ Ab.

A

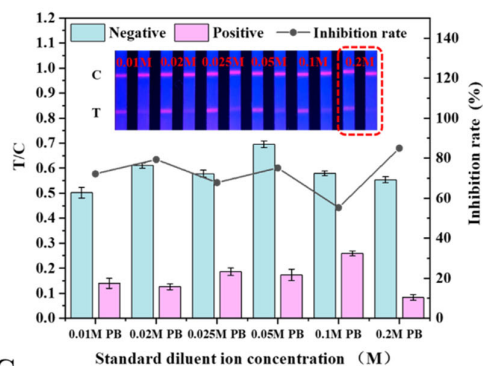

B

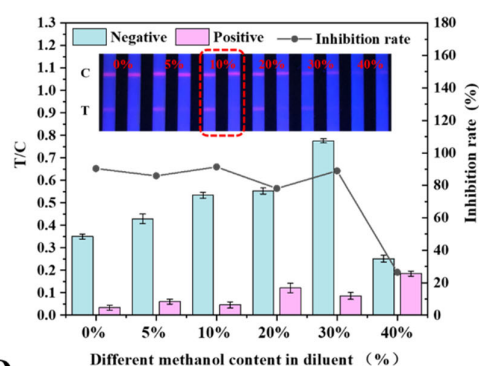

C

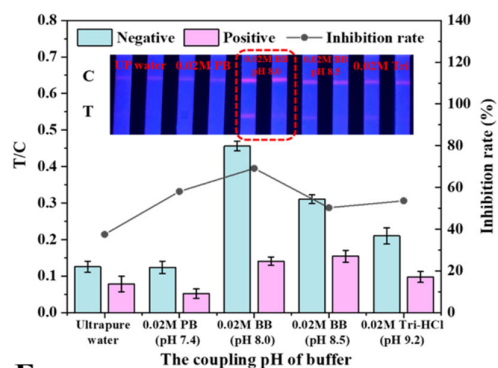

D

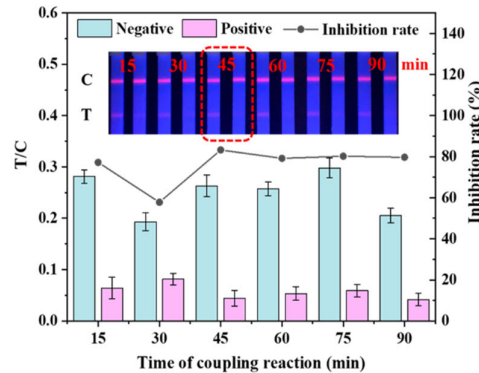

E

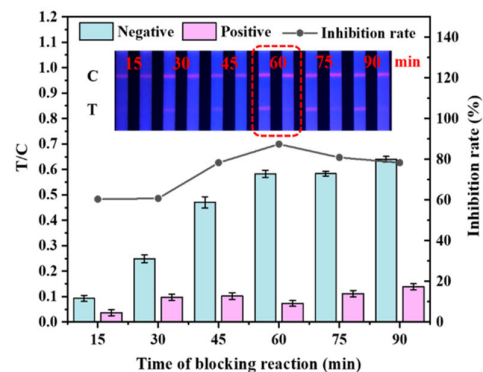

**Figure S4.** Optimization of other working conditions. All the optimize conditions were evaluated by the negative (0 ng/mL) and positive (100 ng/mL). The values of T/C below was calculated from the pictures above by FIC-Q1 fluorescence reader and the screening criteria combined the T/C value, where B and B<sub>0</sub> were the ratio of T/C values with and without propiconazole in the sample solutions. Inhibition rate is equal to  $1 - B_0/B$ . (A) Standard diluent ion concentration, (B) Methanol content in diluent, (C) Coupling pH, (D) Time of coupling reaction, (E) Blocking time.

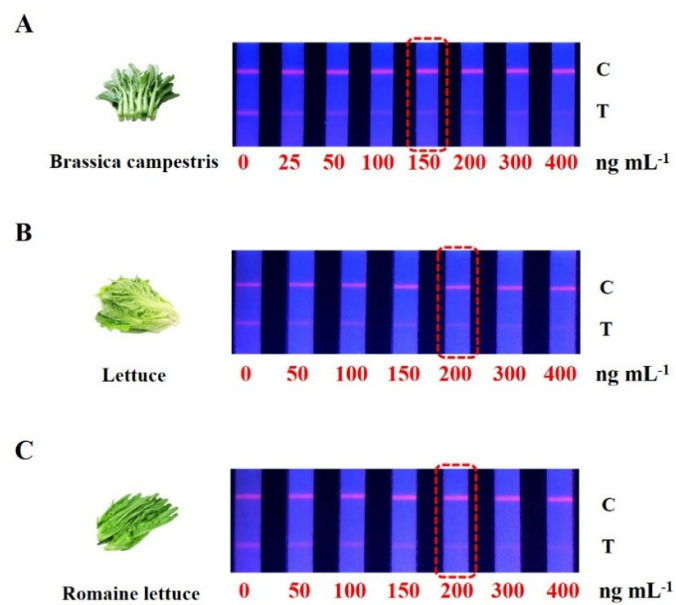

**Figure S5.** Detection results of propiconazole in (A) brassica campestris, (B) lettuce, and (C) romaine lettuce samples by TRFM-LFIA. Red rectangular box represents the vLOD concentrations of propiconazole by TRFM-LFIA.

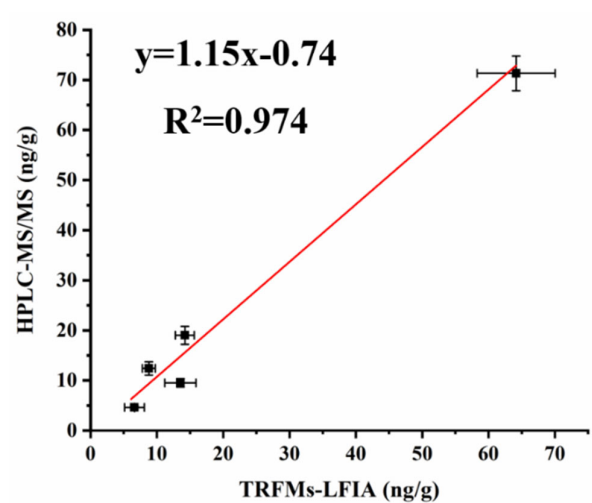

**Figure S6.** The correlation diagram of blind sample detection results of the TRFMs-LFIA and HPLC-MS/MS (n=3)
